# Supplementary material for: Monolayer platform to generate and purify primordial germ-like cells in vitro provides insights into human germline specification
Source: PubMed Central journal article supplement (PMC10502105; doi:10.1038/s41467-023-41302-w), 2023-09-14
Supplement: 41467_2023_41302_MOESM1_ESM.pdf [file 41467_2023_41302_MOESM1_ESM.pdf]

**Figure S1. Further characterization of WNT signaling and candidate posterior epiblast cells, related to Fig. 1**

- a. Flow cytometry analysis of fluorescent reporter expression during differentiation of WIS1 *NANOS3-mCherry* hESCs and H9 *SOX17-GFP* hESCs differentiated using previously-published protocols (Kobayashi et al., 2017; Sasaki et al., 2015).
- b. 6h, 12h, 24h WNT activation in H1, H9, and H9 NANOG YFP. Graphs represent mean with SEM calculated over 3 independent experiments. Below are the FACS plots for each cell line analyzed by CXCR/PDGFRa/GARP staining. N=3, Two-way ANOVA, Tukey's multiple testing correction. Source data are provided as a Source Data file.
- c. hPSCs (ES) vs posterior epiblast (PE) marker analysis from single-cell RNA-seq.
- d. Single-cell RNA-seq comparison between hPSCs and posterior epiblast.
- e. UMAP clustering of posterior epiblast (Day 0.5) cells.

**Fig. S2****a** 3-dimensional principal component analysis of WNT modulation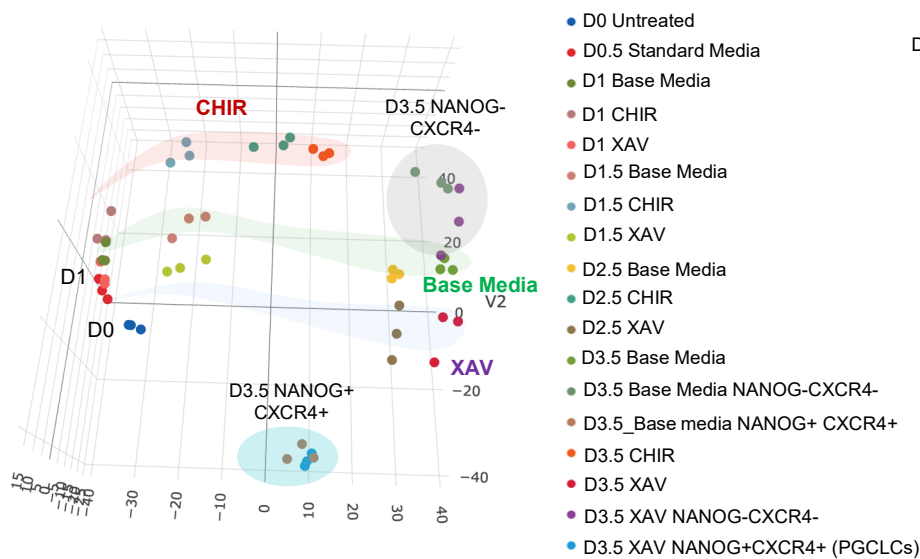**b** Number of differentially expressed genes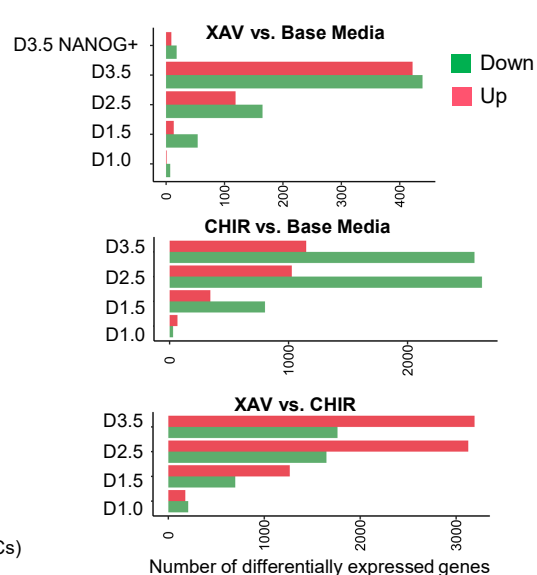**c** Pearson correlation of all D3.5 samples with NANOG+ sorted cells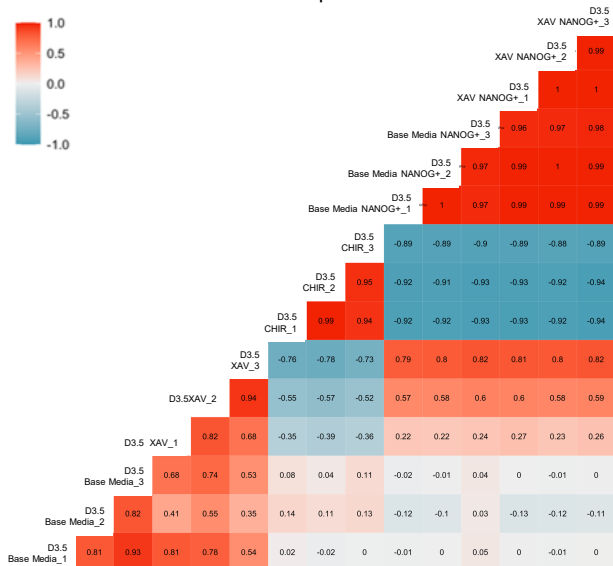**d** mRNA expression of PGCLC surface markers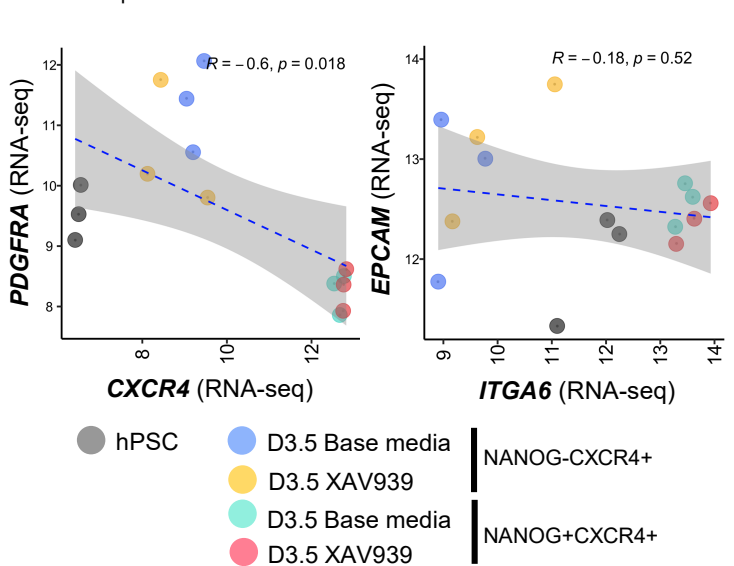**e** Genes upregulated by WNT inhibition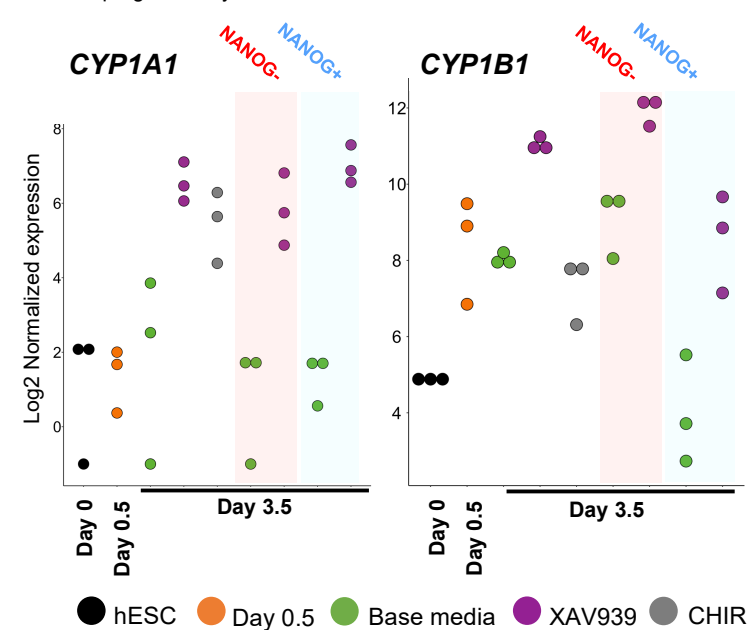**f** Transcriptional effects of WNT inhibition on PGCLCs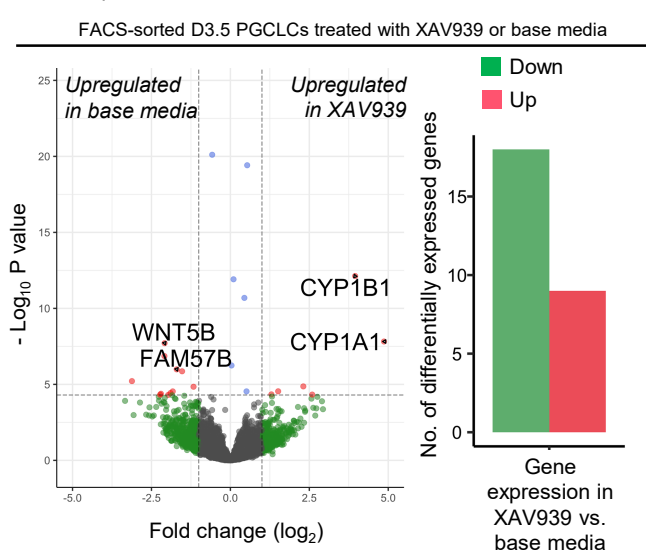

**Figure S2 (related to Fig.2): Bulk RNA-seq analysis of samples with and without WNT pathway manipulation.**

- a. 3D PCA of first three PC components of all bulk RNA-seq samples, with WNT inhibition (XAV939), WNT activation (CHIR) or no manipulation (Base media), across different time points in PGCLC monolayer differentiation.
- b. Number of differentially expressed genes comparing different conditions, cut-off at Fold-change of at least 2. Statistical test - Wald (two-tailed test) with Benjamini-Hochberg multiple testing correction, n=3 biological replicates/group. Related to Fig.2.
- c. Pearson correlation of NANOG+ PGCLCs with Base media vs. XAV939 vs. CHIR treated Day 3.5 samples. Related to Fig. 2d.
- d. Surface marker expression combinations and corresponding Pearson correlation for *PDGFRA* vs. *CXCR4*, or *EPCAM* vs. *ITGA6* in hESC vs. Day 3.5 differentiated NANOG+ PGCLCs vs. NANOG- contaminating cells. Statistical test - Pearson correlation with (2-tailed) 95% confidence interval (error band).
- e. Expression of selected genes enriched in NANOG+ cells from XAV treatment (*CYB1A1* and *CYP1B1*). Related to Fig. 8B.
- f. Differential gene expression comparison between sorted NANOG+ PGCLCs from Base media vs. XAV939 treated cells. cut-off at Fold-change of at least 2. Statistical test - Wald (two-tailed test) with Benjamini-Hochberg multiple testing correction, n=3 biological replicates/group. Abbreviations: FC- fold change; padj. - adjusted pvalue



# Fig. S3

a Prolonged WNT activation leads to sustained primitive streak marker expression

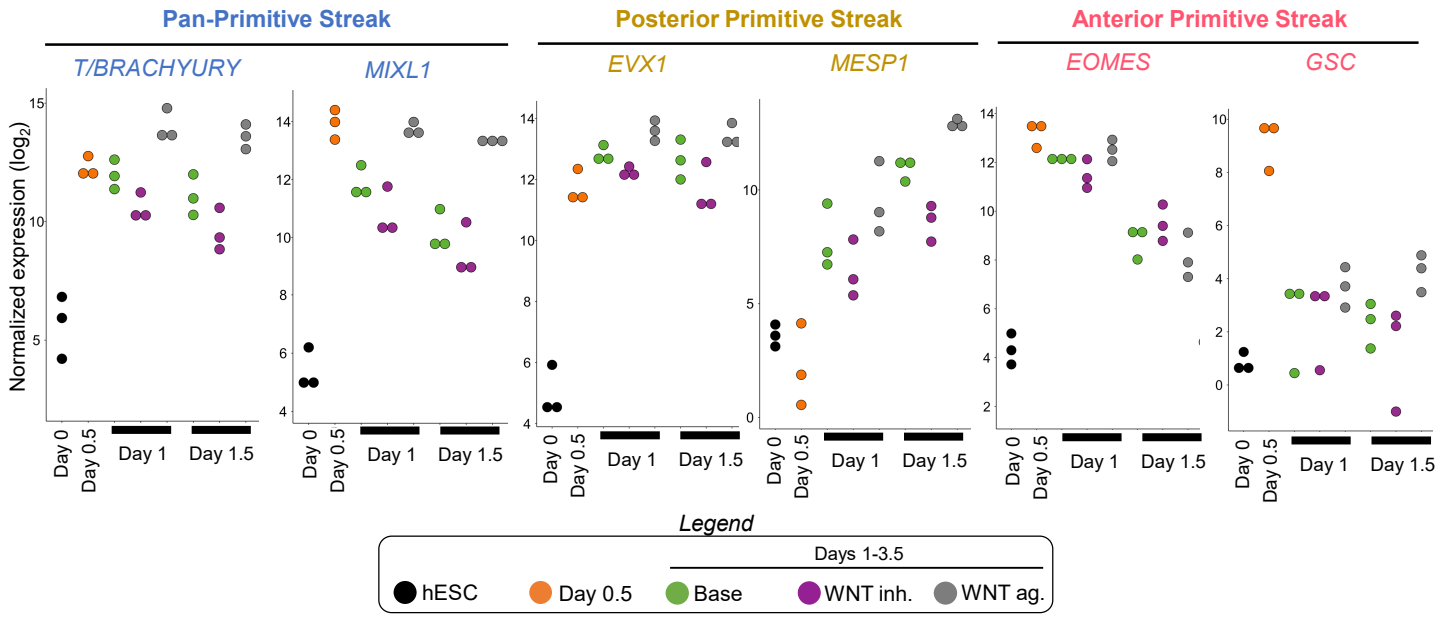

b Prolonged WNT activation strongly blocks PGCLC specification

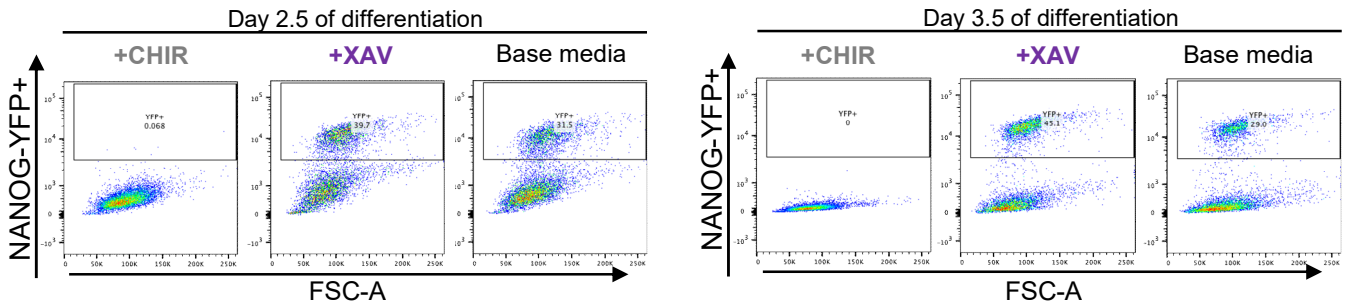

**Figure S3 (related to Fig. 2b): WNT activation promotes Primitive streak marker expression.**

- a. Expression levels of Pan-primitive streak, posterior primitive streak and anterior primitive streak markers under Base media or XAV939 or CHIR99021 treatment.
- b. Representative FACS plots of PGCLC sorted cells (NANOG-YFP+) from different treatment conditions at Day 2.5 and Day 3.5. Source data are provided as a Source Data file.

# Fig. S4

## a Withholding BMP, SCF and EGF at distinct times

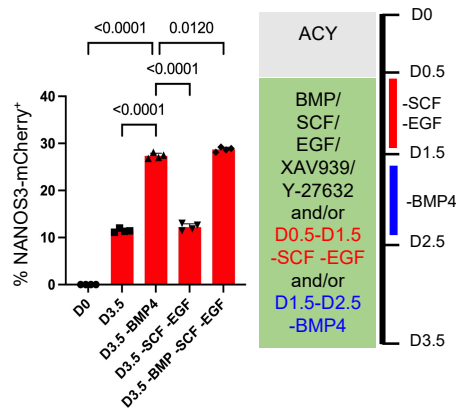

## b Low BMP doses needed for monolayer differentiation

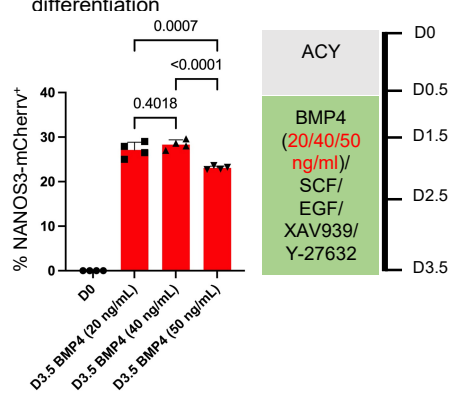

## c LIF dispensable for second differentiation stage

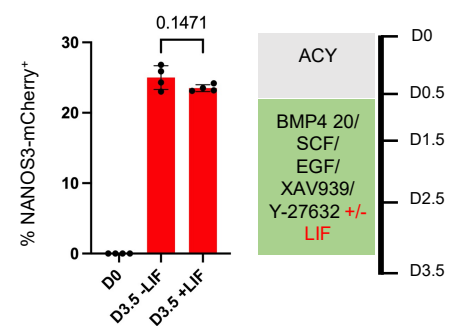

## d 3 days are optimal for 2<sup>nd</sup> differentiation stage

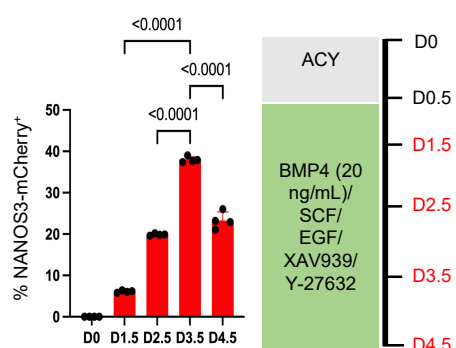

## e PGCLCs harbor 5-hydroxymethylcytosine

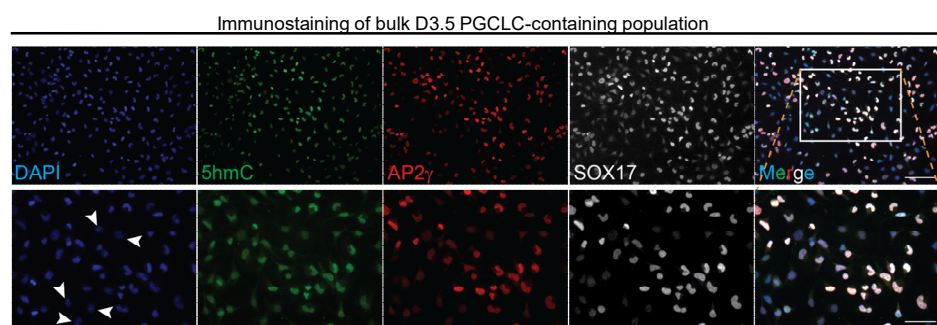

## f Generating SOX17-GFP<sup>+</sup> PGCLCs

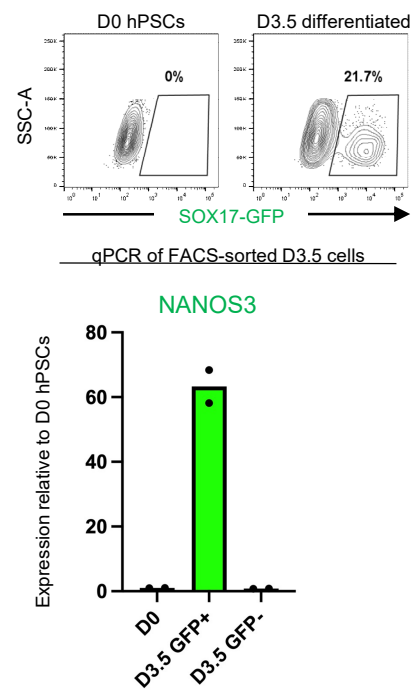

## g Loss of one SOX17 allele in the SOX17-GFP reporter line partially impairs PGC specification

Day 3.5 qPCR

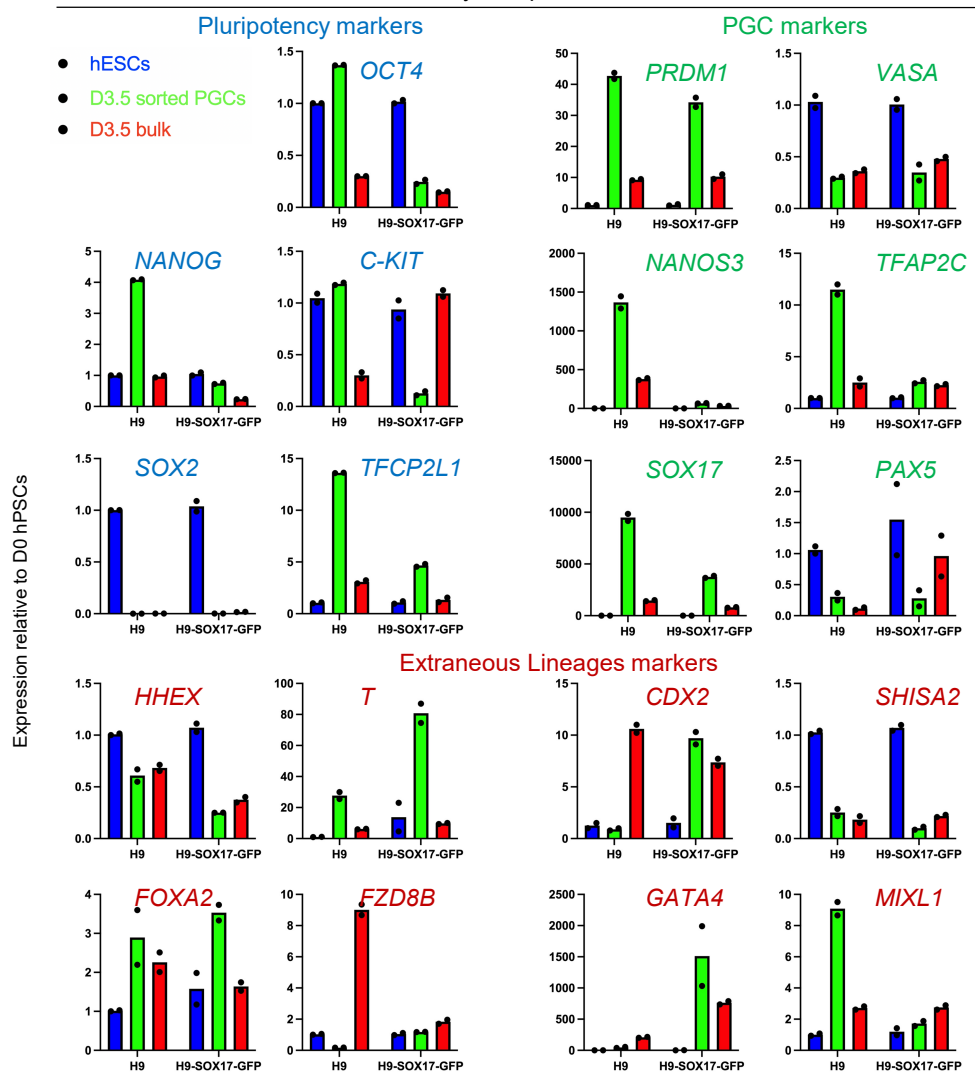

**Figure S4. Optimization of human PGCLC differentiation protocol in simplified monolayer conditions, related to Fig. 4**

- a. *NANOS3-mCherry* hPSCs were first differentiated into posterior epiblast (ACY = Activin + CHIR + Y27632 for 12 hrs); subsequently, for posterior epiblast differentiation into PGCs in the context of BMP4 + SCF + EGF + XAV939 + Y-27632 from D0.5-3.5, BMP4 subtraction from D1.5-2.5 and SCF/EGF subtraction from D0.5-1.5 both enhance efficiency, as assayed by flow cytometry analysis for *NANOS3-mCherry* fluorescent reporter expression on D3.5. N=4 biological replicates. Statistical analysis, one way ANOVA with Tukey's multiple comparison test. Source data are provided as a Source Data file.
- b. BMP4 can be titrated to 20 ng/mL on D0.5-3.5 without significant loss in efficiency, as assayed by flow cytometry analysis for *NANOS3-mCherry* fluorescent reporter expression on D3.5. N=4 biological replicates. Statistical analysis, one way ANOVA with Tukey's multiple comparison test. Source data are provided as a Source Data file.
- c. Addition of LIF during D0.5-3.5 does not improve efficiency, as assayed by flow cytometry analysis for *NANOS3-mCherry* fluorescent reporter expression on D3.5. N=4 biological replicates. Statistical analysis, one way ANOVA with Tukey's multiple comparison test. Source data are provided as a Source Data file.
- d. In our hPSC-to-PGC differentiation protocol, *mCherry* expression peaks on D3.5 of differentiation, as assayed by flow cytometry analysis for *NANOS3-mCherry* fluorescent reporter expression on various timepoints. N=4 biological replicates. Statistical analysis, one way ANOVA with Tukey's multiple comparison test. Source data are provided as a Source Data file.
- e. Representative images of H9 hESCs fixed at D3.5 and stained for the reported markers. Arrowheads indicate cells with decreased 5hmC signal, corresponding to non-hPGCLCs as highlighted by lack of expression of PGC specific markers from 3 independent experiments. Bottom row the subset of cells in the rectangle at higher magnification. Scale bar = 100um for top row, 50um for bottom row. DAPI was used as nuclear counterstain.
- f. H9 *SOX17-GFP* hESCs were differentiated into PGCs and flow cytometry was performed to assay reporter expression before or after 3.5 days of differentiation (*top*); to confirm that *SOX17-GFP*<sup>+</sup> D3.5 cells are PGCs, qPCR was performed on D3.5 *SOX17-GFP*<sup>+</sup> and *SOX17-GFP*<sup>-</sup> cells for PGC marker *NANOS3*; as a negative control, undifferentiated hPSCs (D0) were also analyzed, and gene expression is shown relative to undifferentiated hPSCs (which was set = 1.0). N=2. Source data are provided as a Source Data file.
- g. Comparison of wild-type H9 hESCs vs. *SOX17-GFP* hESCs (where one *SOX17* allele is replaced with *GFP*, thus generating functionally *SOX17*-heterozygous cells (Wang et al., 2011)) differentiated into PGCs; qPCR was performed on undifferentiated hESCs (D0), D3.5 bulk populations and D3.5 FACS-purified PGCs in the 2 genetic backgrounds; gene expression is shown relative to undifferentiated hPSCs (which was set = 1.0). N=2. Source data are provided as a Source Data file.

**Fig. S5****a** Multiple PGCLC cell-surface markers are expressed in undifferentiated hPSCs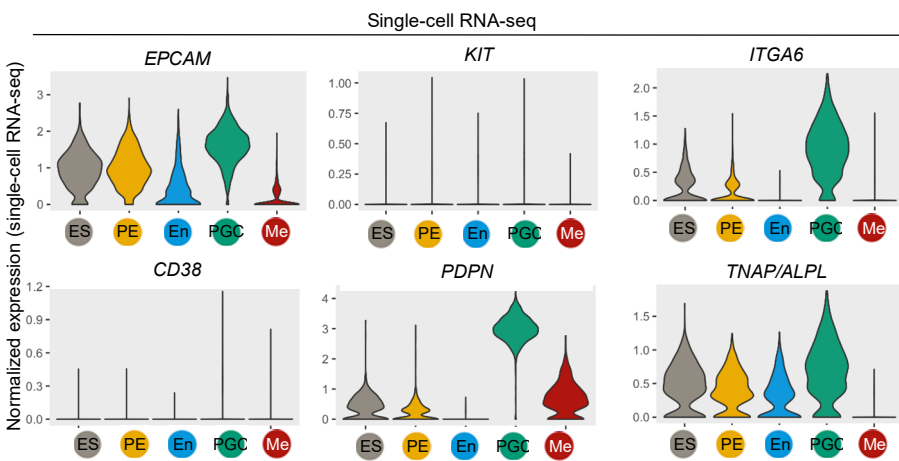**b** Monolayer PGCLC induction across iPSC lines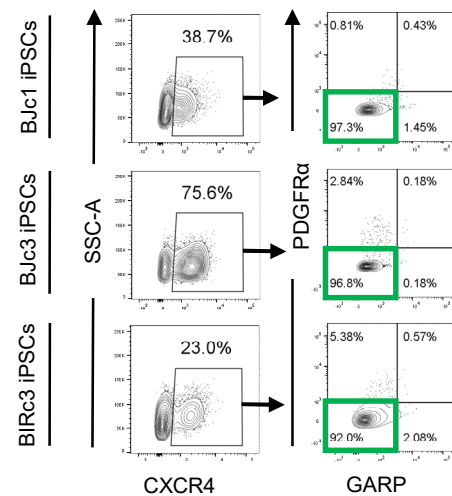**c** PGCs generated from multiple hPSC lines display appropriate marker expression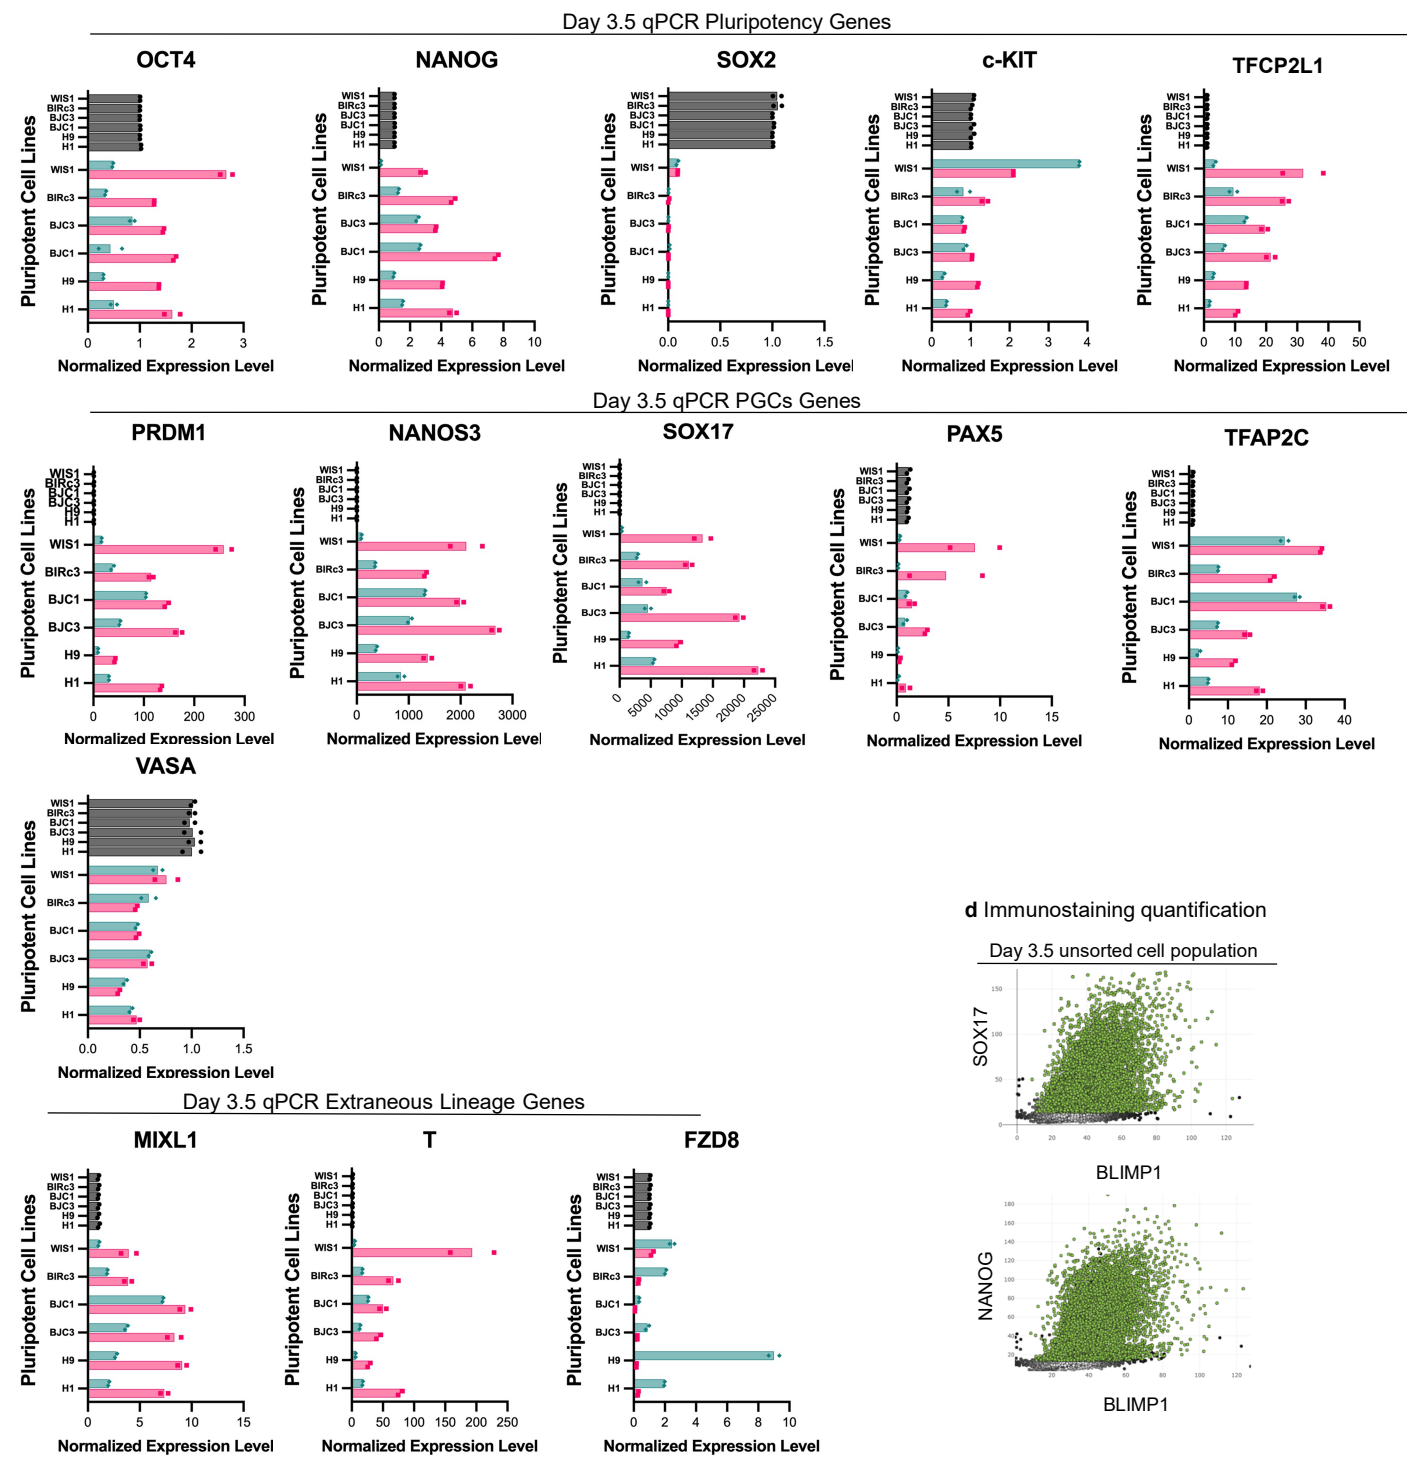**d** Immunostaining quantification

Day 3.5 unsorted cell population

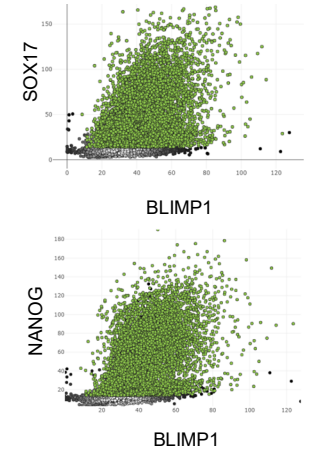

**Figure S5. Expression of surface markers in single cell RNA-seq data, related to Fig 5**

- a. Single-cell RNA-seq reveals the expression of transcripts that encode previously-reported cell-surface markers of PGCLCs (cell-types were classified as shown in
- b. The indicated iPSC lines were used to induce hPGCLCs with the current protocol. Source data are provided as a Source Data file.
- c. Gene expression of pluripotency, PGC-specific, and exogenous markers assessed by qPCR analysis of bulk D3.5 population (unsorted) and FACS-purified hPGCLCs. FACS analysis was performed based on the CXCR4+/PDGFRa-/GARP- surface signature. qPCR data were normalized to expression in undifferentiated cells (set at 1.0). N=2. Source data are provided as a Source Data file.
- d. Representative fluorescence threshold determination for immunofluorescence quantification of D3.5 unsorted cells based on the 3 reported PGC-markers. See Materials and Methods for analysis details.

**Fig. S6**

**a Quality metrics of single-cell RNA-seq data**

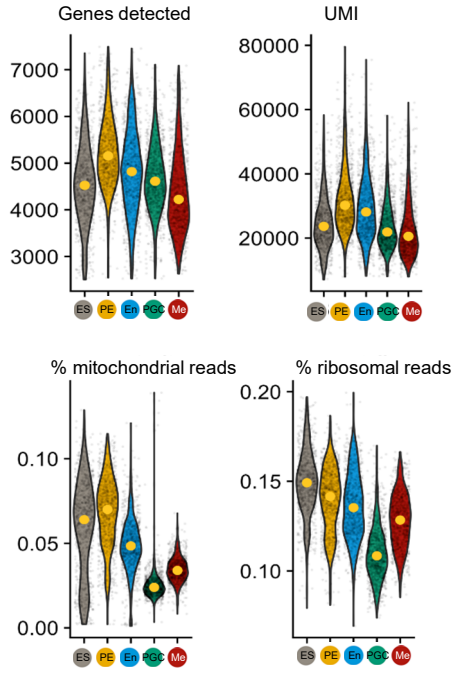

**b Transcriptionally assigning cell-types from scRNAseq data**

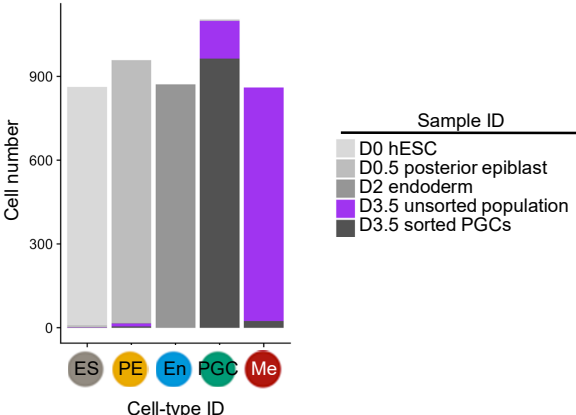

**c Mutually-exclusive germ vs. mesoderm marker expression**

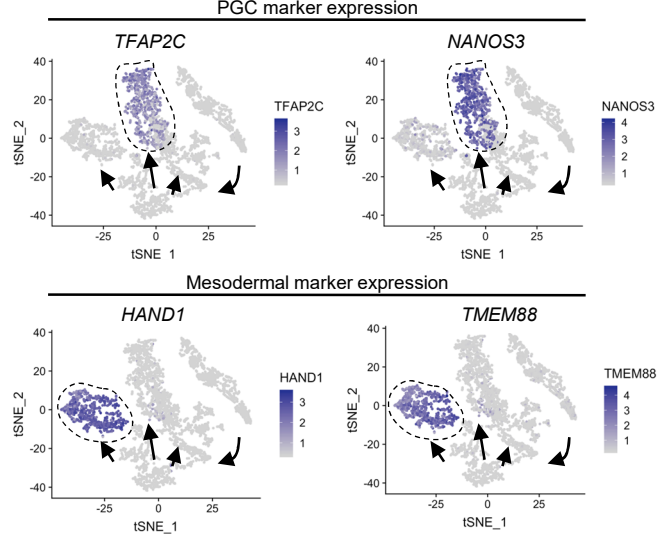

**d Top differentially expressed genes distinguishing the major cell-types**

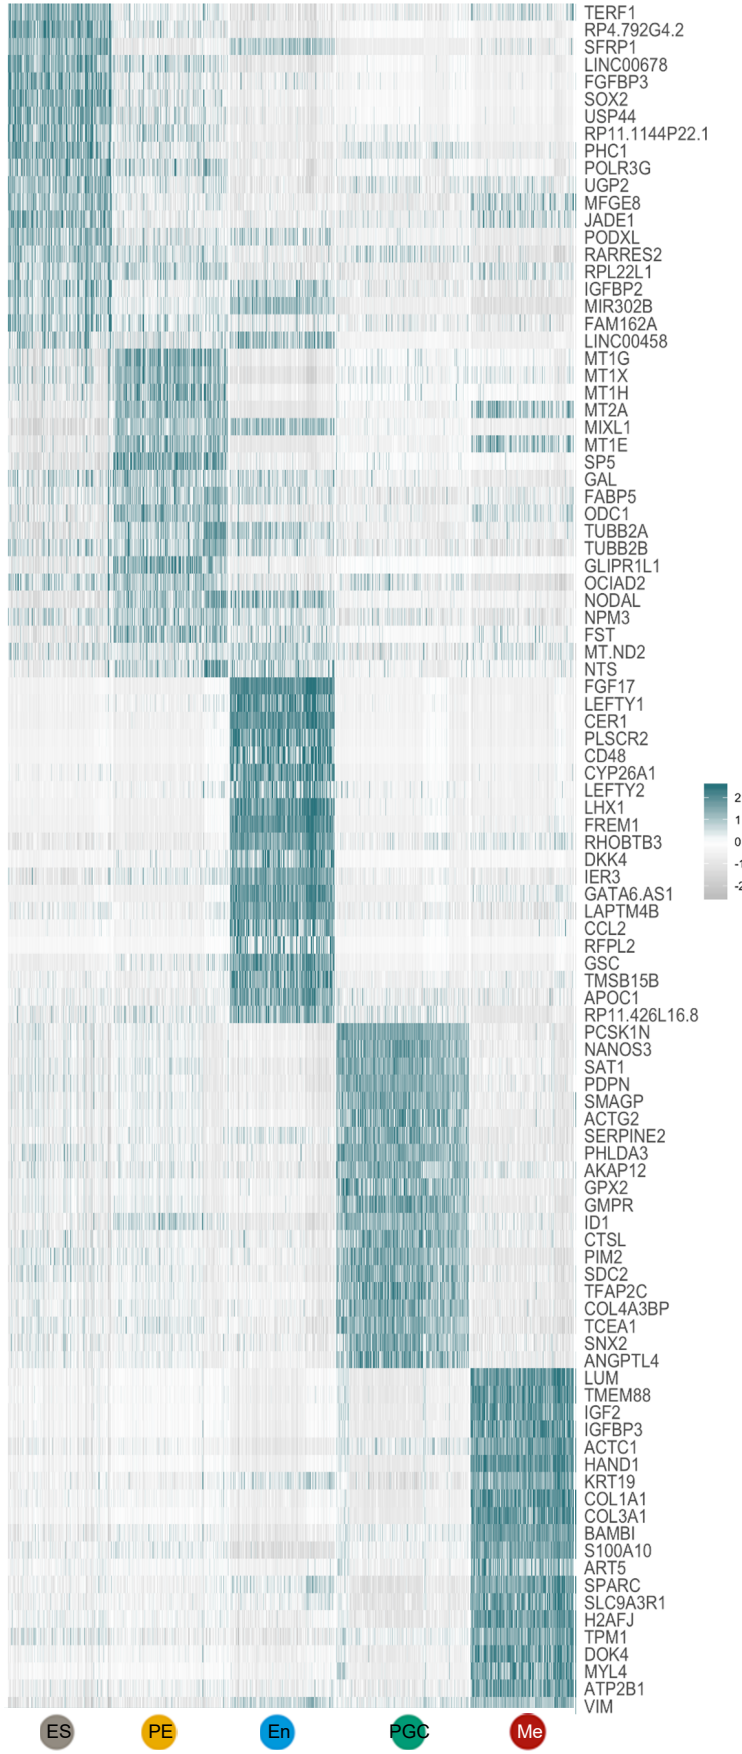

**Figure S6. Quality control and cell-type-specific, differentially expressed genes from single-cell RNA-seq datasets, related to Fig. 7**

- a. Violin plot of genes detected, unique molecular identifier (UMI) counts, percent mitochondrial reads and percent ribosomal reads across all 5 cell-type clusters (ES = undifferentiated hESCs; PE = posterior epiblast; En = endoderm; Me = mesoderm [non-PGC])
- b. Proportion of cells from different libraries in each cluster; N.B. PGCs are found in both the D3.5 bulk as well as the D3.5 FACS-sorted PGC samples, whereas mesoderm cells are found almost exclusively in the D3.5 bulk population but not the D3.5 FACS-sorted PGC samples
- c. *t*-SNE plot with overlaid expression of PGC and mesoderm markers showing that these markers are expressed in a mutually-exclusive fashion in different cell clusters
- d. Heatmap of top differentially expressed genes across the 5 major clusters (i.e., cell-types)



**Fig. S7****a** Pseudotime trajectories leading to PGCLC vs. non-PGCLC fates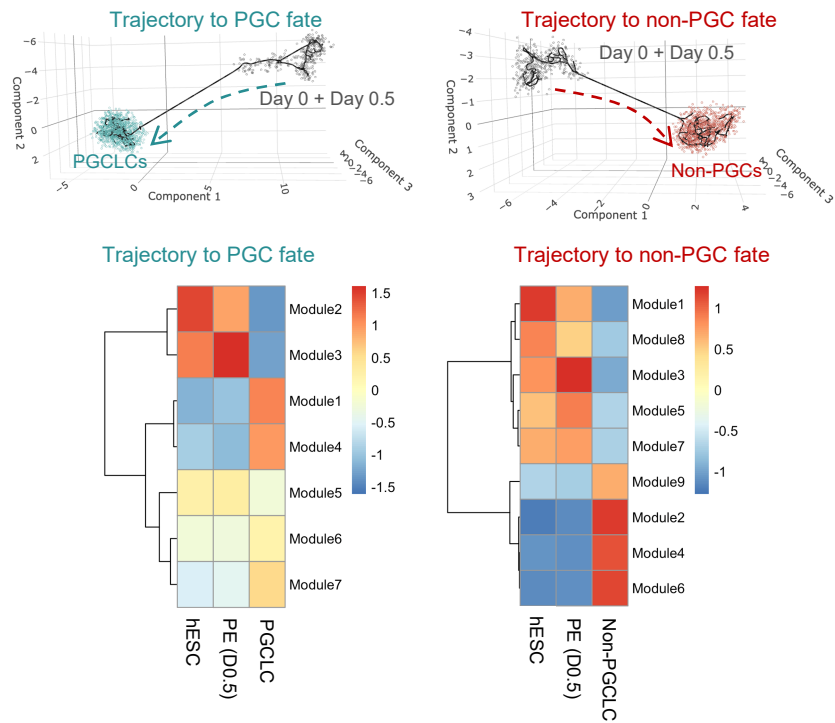**b** Pseudotime trajectories overlaid on t-SNE projection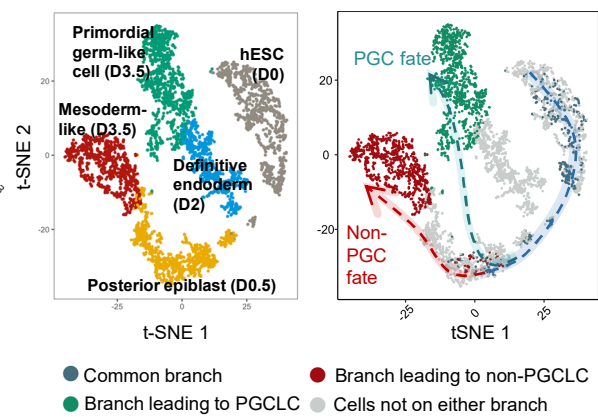**c** Representative genes changing with pseudotime along PGCLC vs. non-PGCLC trajectories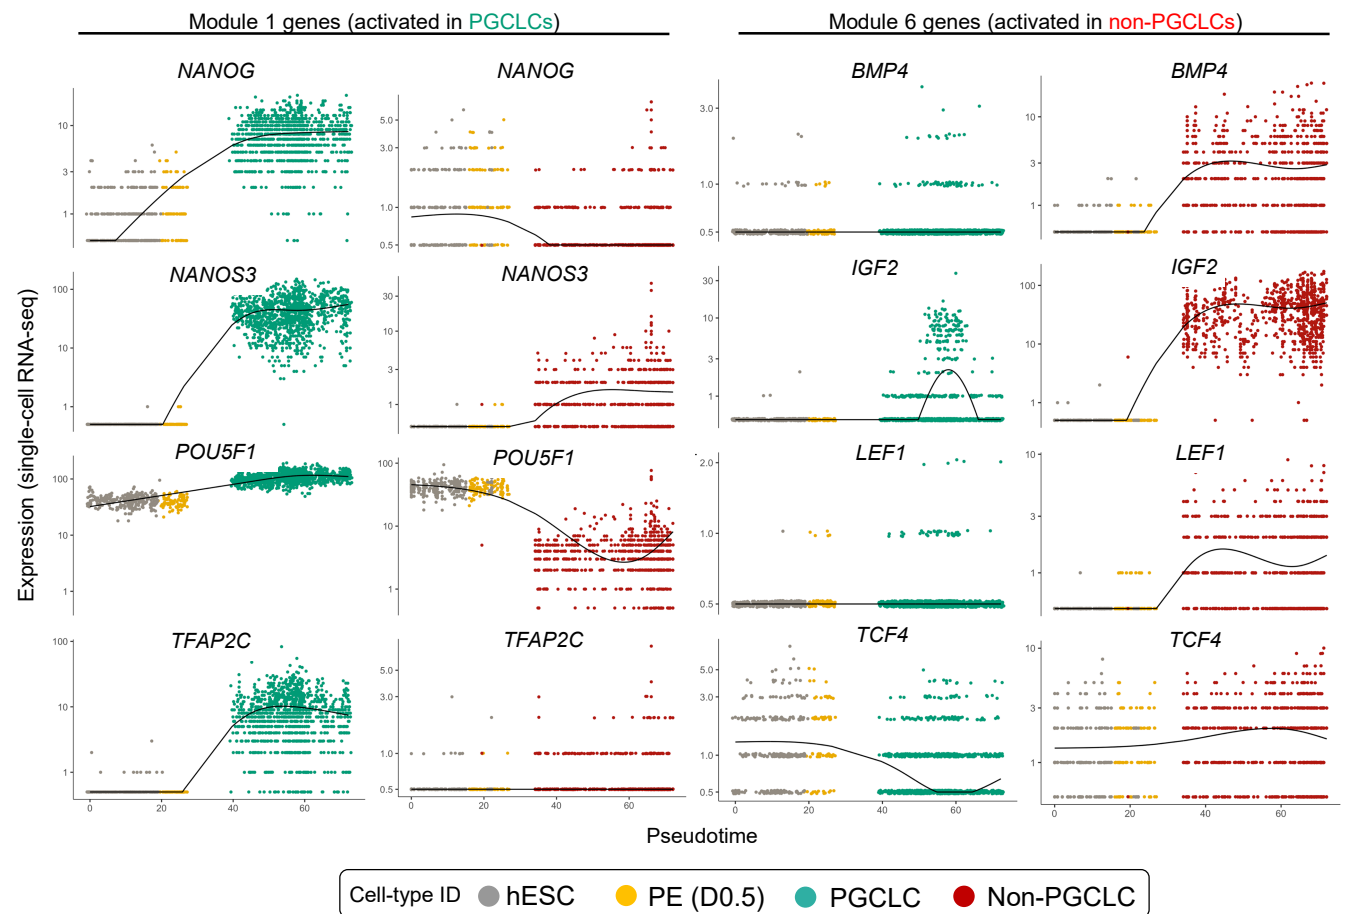

**Figure S7. Trajectory analysis of hPSC differentiation to PGCLCs, related to Fig. 7**

- a. Pseudotemporal ordering of hESCs differentiating to PGCLCs, showing branchpoint analysis, leading to PGCLC fate vs. non-PGCLC (mesoderm-like cells) fate (top). Modules of genes significantly changing with pseudotime on trajectory to PGCLC fate vs. non-PGCLC fate (bottom).
- b. Cells from PGCLC trajectory vs. non-PGCLC trajectory (from A) overlaid on tSNE analysis.
- c. Representative genes from Module 1 on trajectory to PGCLC fate and Module 6 on trajectory to non-PGCLC fate.

**Fig. S8****a** Transcriptional heterogeneity of D3.5 FACS-sorted CXCR4+ PDGFRA- GARP- cells  
i. Subclusters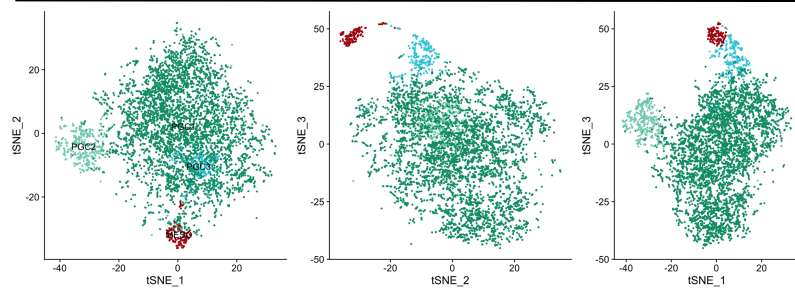

## ii. Cellular abundance of each subcluster

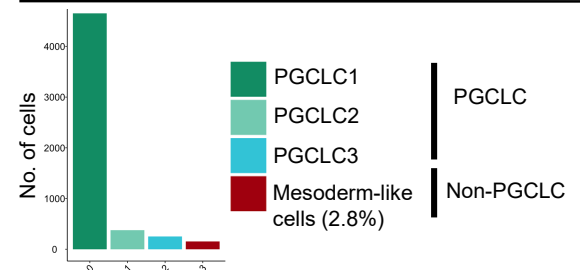**b** Quality control of D3.5 sorted cells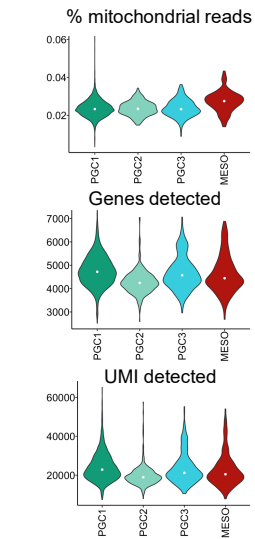**c** PGC and non-PGC markers expressed in subsets of D3.5 FACS-sorted cells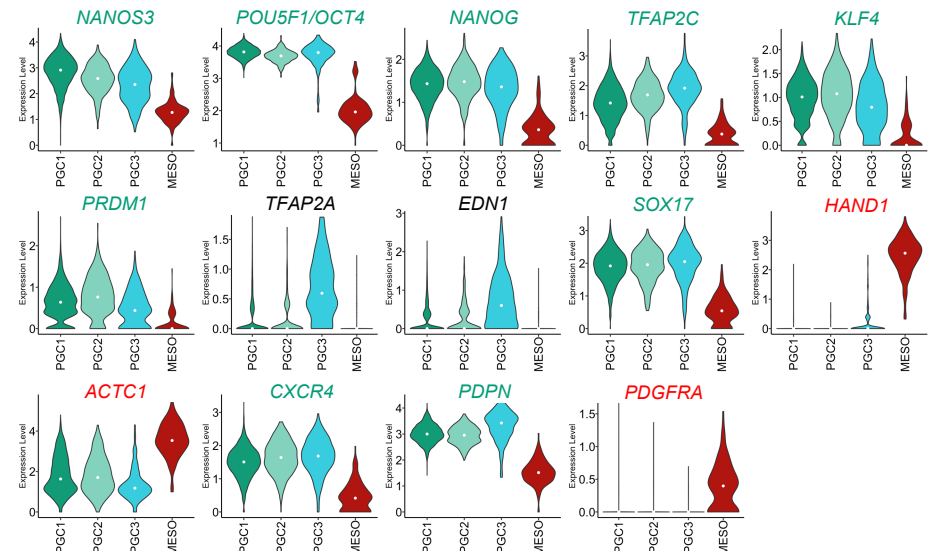**d** Differentially expressed genes in D3.5 sorted cells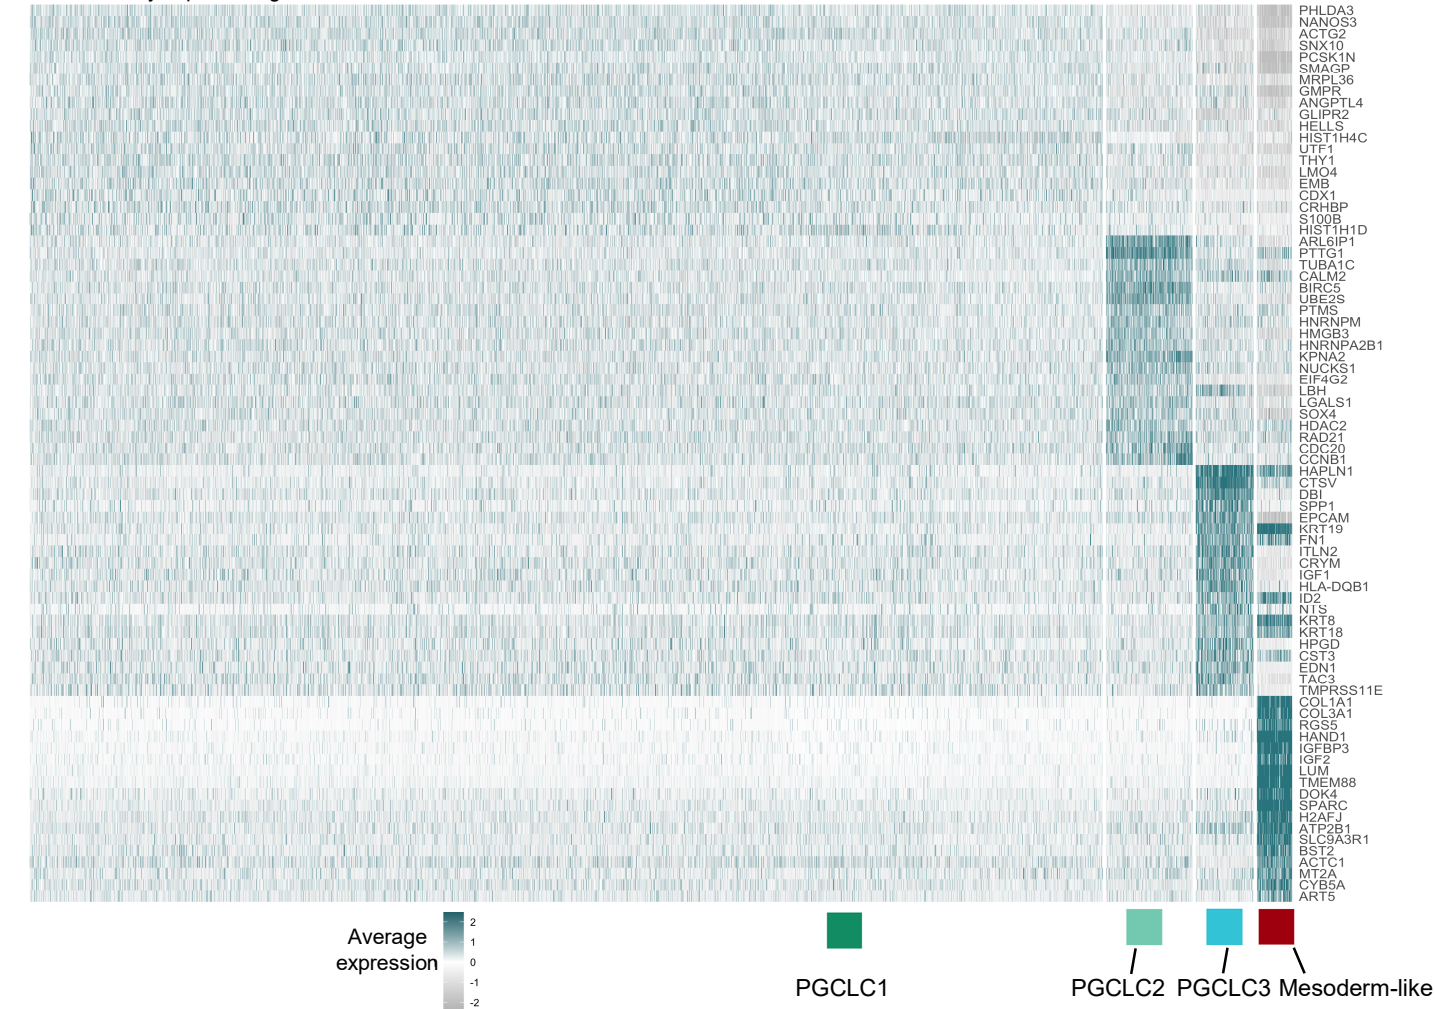

**Figure S8: Heterogeneity within Day 3.5 sorted PGCLCs, related to Fig.7.**

- a. Clustering analysis of Day 3.5 sorted PGCLCs, showing 4 subclusters (i). Number of cells per cluster in Day 3.5 sorted PGCLCs. 2.8% of cells were mesoderm-like, non-PGCLCs (ii).
- b. Quality control analysis of Day 3.5 sorted PGCLCs, showing percent mitochondrial genes detected, total number of genes detected per cluster, and total unique molecular identifiers (UMI) detected per cluster.
- c. Violin plot showing expression levels of PGC and non-PGC markers across clusters.
- d. Heatmap of differentially expressed genes across clusters.

**Fig. S9****a** Bifurcation of  $\text{NANOG}^+$  hPSCs/posterior epiblast into  $\text{NANOG}^+$   $\text{CXCR4}^+$  PGCs vs.  $\text{NANOG}^-$   $\text{CXCR4}^-$  non-PGCs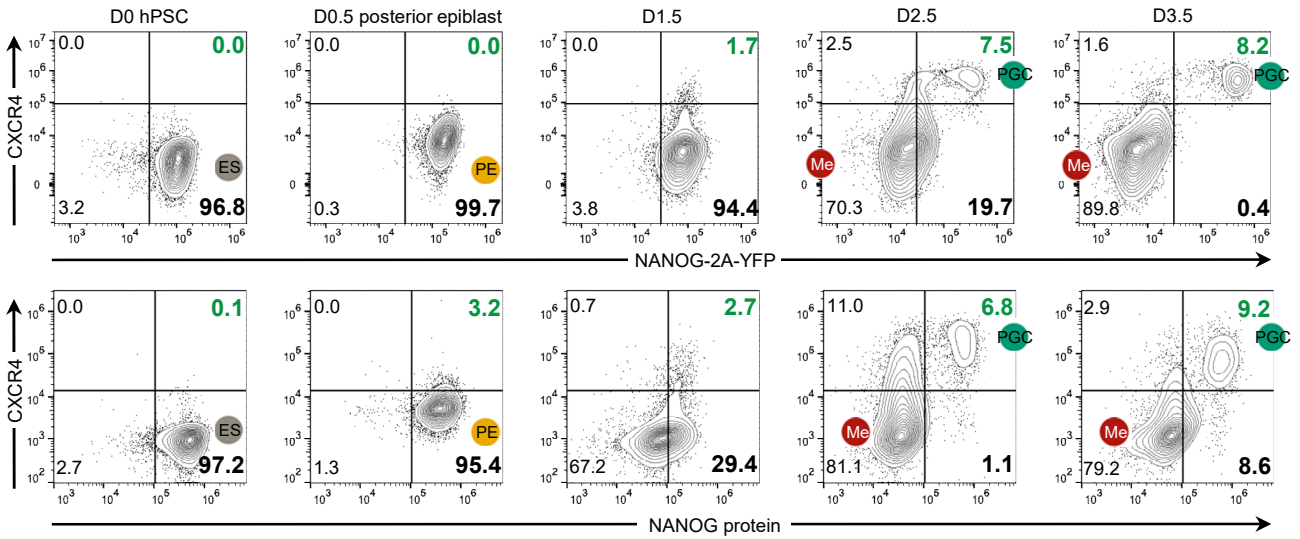**b**  $\text{NANOG}$  protein continuously expressed during PGCLC formation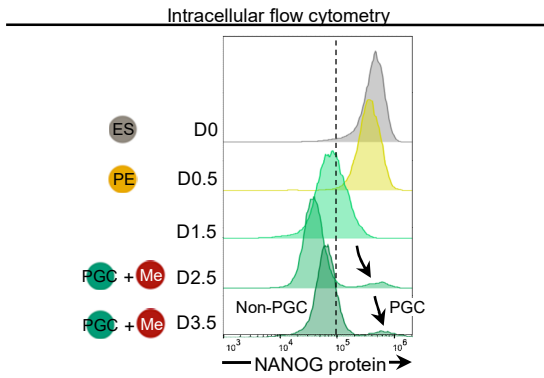**c**  $\text{SOX17}$  becomes co-expressed with  $\text{OCT4}$  and  $\text{NANOG}$ 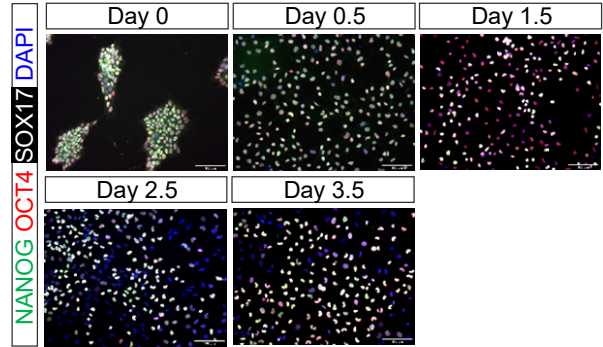**d** qPCR quantification of  $\text{NANOG}$  siRNA knockdown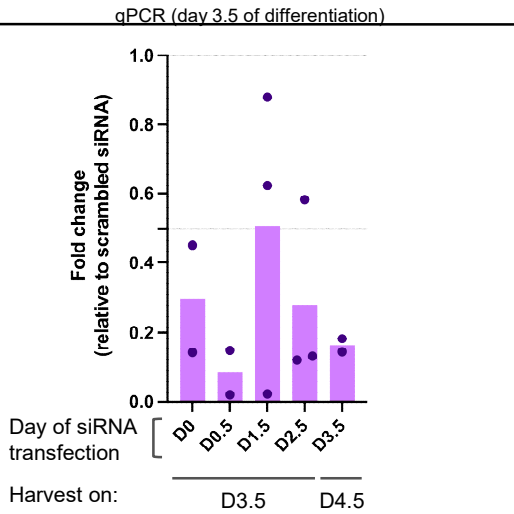

**Figure S9: Continuous pluripotency factor expression during PGCLC differentiation, related to Fig. 8.**

- a. Flow cytometry analysis of *NANOG-2A-YFP* hPSCs differentiated towards PGCs, with surface staining of CXCR4 combined with either flow cytometry analysis of *NANOG-2A-YFP* reporter activity or else intracellular staining of NANOG protein itself. Source data are provided as a Source Data file.
- b. Intracellular flow cytometry for NANOG protein expression during hPSC differentiation towards PGCs.
- c. Representative merged immunofluorescence images of H9 stained at each timepoint during the 3.5 days of differentiation with the indicated markers, from 3 independent experiments. Scale bar = 100mm.
- d. NANOG expression in unsorted siRNA (targeting NANOG) transfected cells relative to cells transfected with scrambled siRNA measured by qPCR. Days on which siRNA transfection was started and when they were harvest is shown below. N=2 biological replicates/group for all except Day 1.5 and Day 2.5, and n=3 biological replicates/group.

# Fig. S10

**a** Computationally downsampling D3.5 PGCLCs analyzed by single-cell RNA-seq **c** Clustering of *in vivo* fetal PGCs, somatic cells and *in vitro* PGCLCs

|                      |        |        |        |        |        |        |
|----------------------|--------|--------|--------|--------|--------|--------|
| Number of D3.5 cells | 300    | 545    | 1362   | 2724   | 4085   | 5447   |
| Downsampling (%)     | 94%    | 90%    | 75%    | 50%    | 25%    | 0%     |
| Genes detected       | 16,590 | 17,190 | 17,617 | 17,643 | 17,645 | 17,645 |
| Genes detected (%)   | 94%    | 97%    | 100%   | 100%   | 100%   | 100%   |

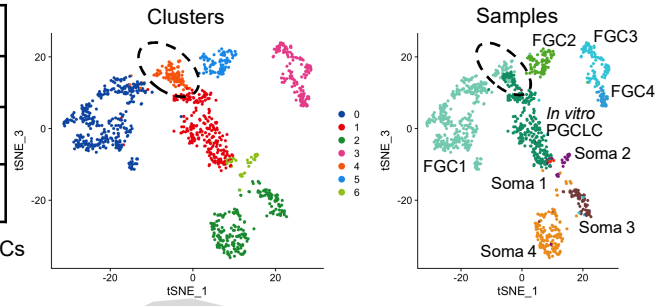

**b** Single-cell RNA-seq of *in vivo* fetal germ and somatic cells and *in vitro* PGCLCs

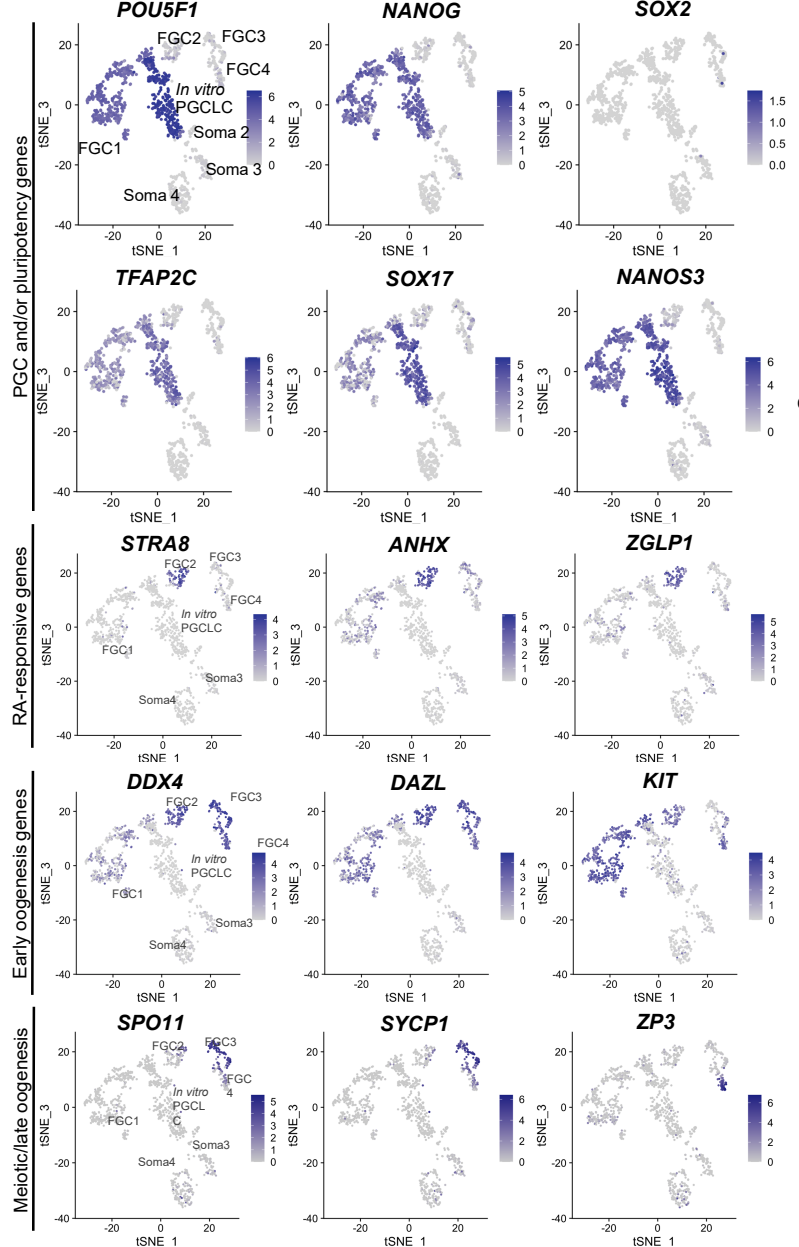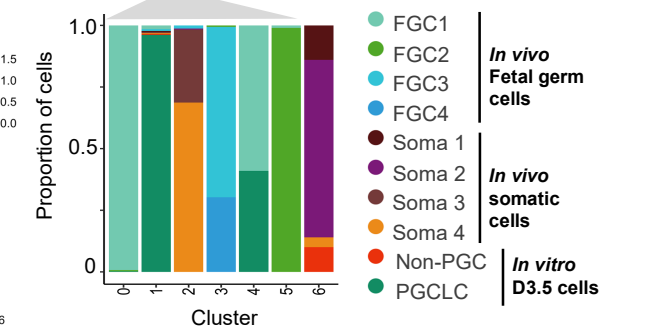

**d** Gene ontology of differentially expressed genes between clusters

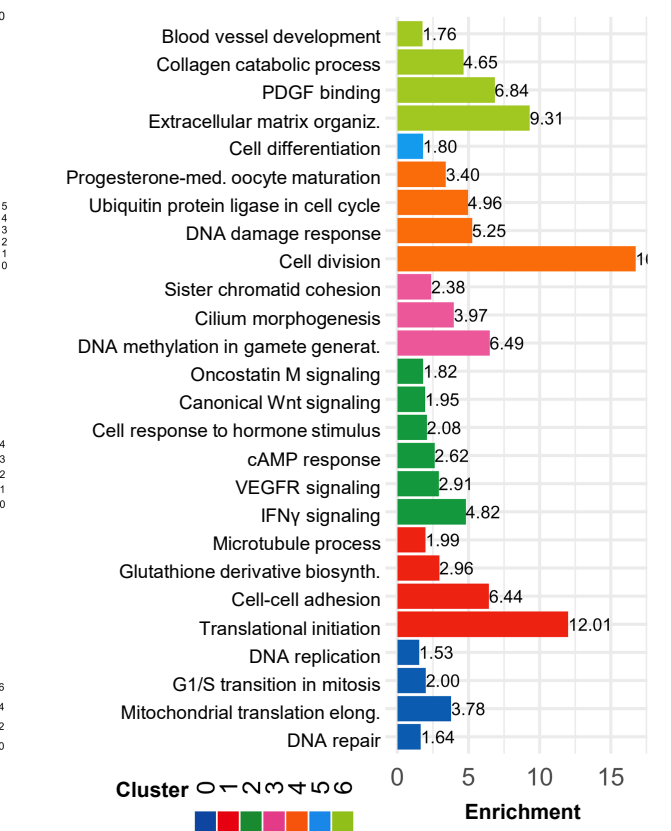

**e** Top 10 differentially expressed genes between clusters

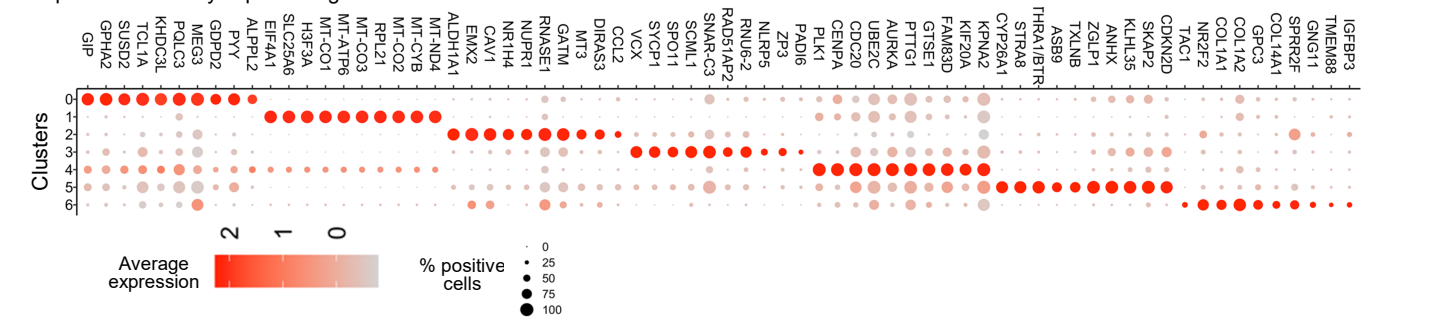

**Figure S10: Single-cell RNA-seq comparison of hPSC-derived PGCLCs *in vitro* vs. human fetal germ cells *in vivo*, related to Fig. 9.**

- a. In the scRNA-seq comparisons of hPSC-derived PGCLCs *in vitro* vs. human fetal germ cells and somatic cells *in vivo*, we randomly selected a subset of PGCLCs (“downsampling”) for further analysis (**Supplementary Methods**). hPSC-derived FACS-sorted CXCR4<sup>+</sup> GARP<sup>-</sup> PDGFRA<sup>-</sup> D3.5 PGCLCs were used for this analysis, and we progressively downsampled the population and assessed how many genes across the transcriptome were expressed in at least one cell.
- b. Expression patterns of early PGC markers, RA-responsive genes, early oogenesis markers and meiotic/late oogenesis genes, depicted on *t*-SNE plots of *in vivo*-derived FGCs and somatic cells (Li et al., 2017) and *in vitro*-derived FACS-sorted CXCR4<sup>+</sup> PDGFRA<sup>-</sup> GARP<sup>-</sup> D3.5 PGCLCs.
- c. Integrated clustering of human fetal female germ cells clusters (FGC1-4) and somatic cells clusters (Soma1-4) with *in vitro* Day 3.5 sorted PGCLCs and non-PGCLCs. tSNE clustering analysis show 6 different clusters (*left*) and samples color coded (*right*). Below, the fraction of cells from each sample within each cluster is reported.
- d. Gene ontology enrichment analysis of biological processes enriched in the different clusters.
- e. Top 10 differentially expressed genes between clusters.



# Fig. S11

## a Single-cell RNA-seq comparison of 2D- and 3D-induced PGCLCs

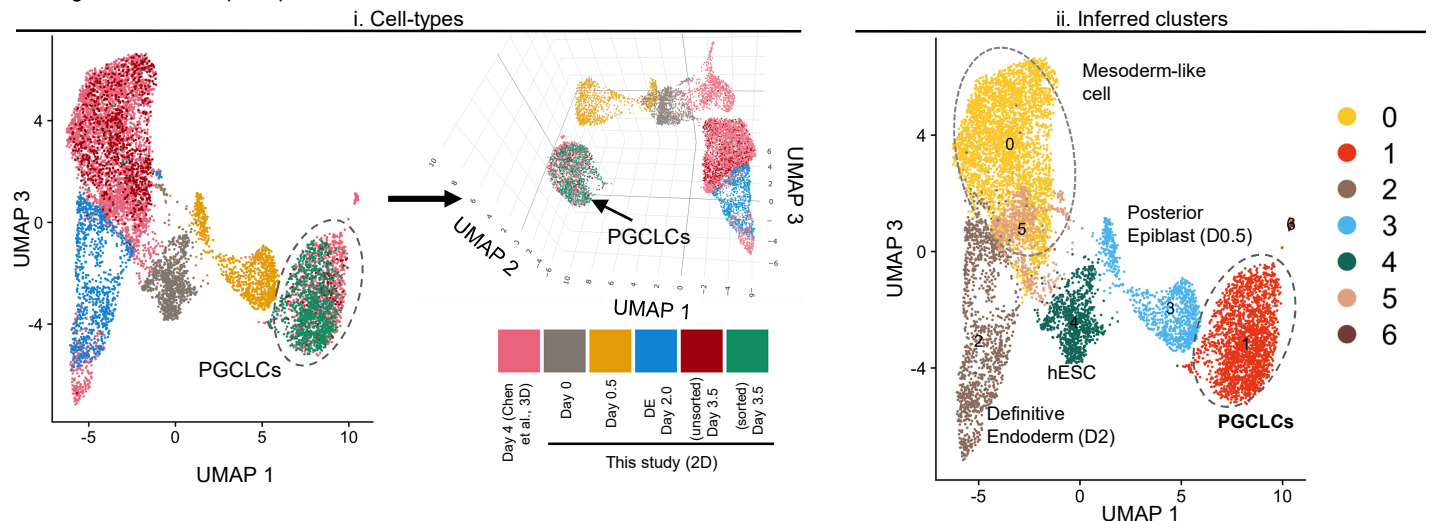

## b Marker expression across clusters

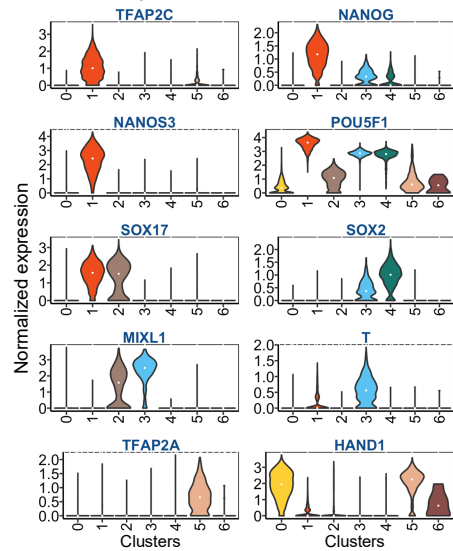

## c Cell-type composition of clusters

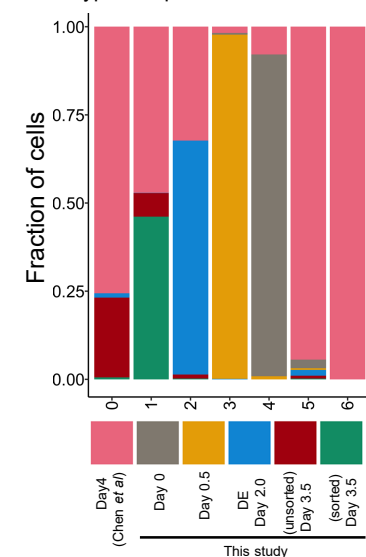

## d Marker expression across clusters

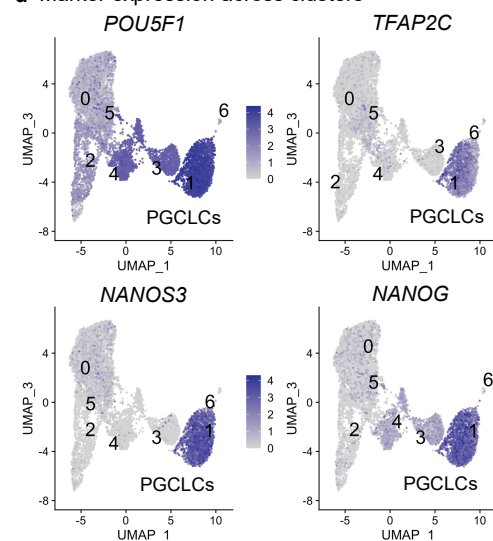

## e Marker expression across cell-types

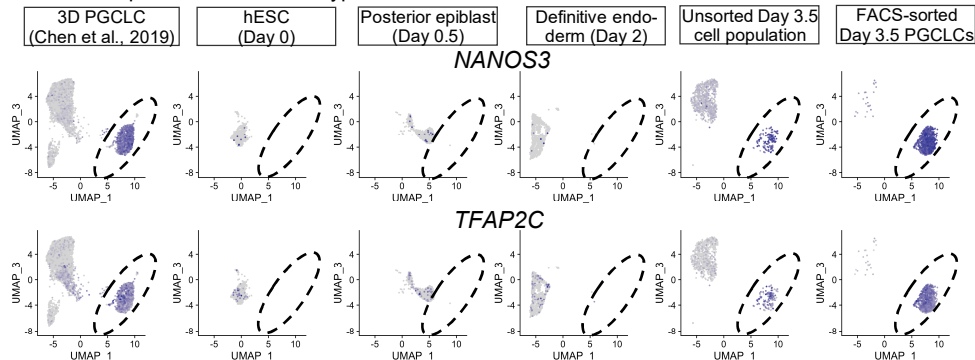

## f Comparison of 2D- vs. 3D-induced PGCLCs

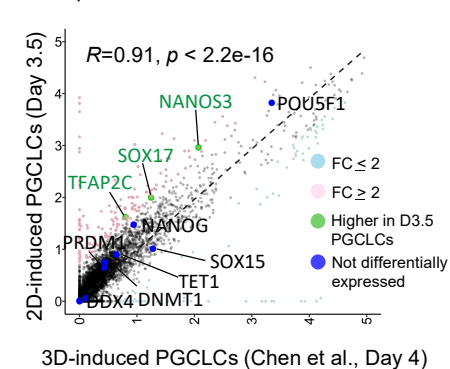

## g Gene ontology comparison of 2D- vs. 3D-induced PGCLCs

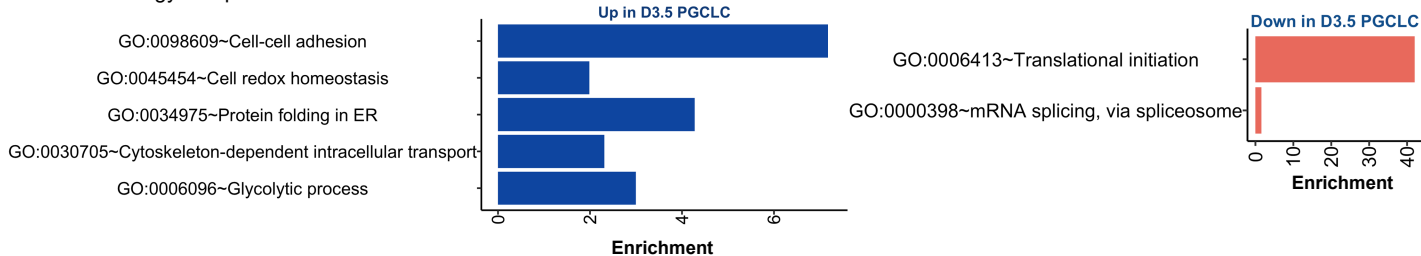

**Figure S11: Comparison of PGCLCs from this study with *in vitro* derived human PGCLCs from Chen *et al*, 2019.**

- a. Integrated clustering of Day 4 PGCLCs from Chen *et al*, 2019, Cell Reports (down sampled to 5000 cells) with cells from this study (down sampled to 1000 cells per group) (i). Clustering analysis of integrated data in (A) (ii).
- b. Violin plot of expression levels of key PGC markers across clusters.
- c. Fraction of cells from each group present within each cluster.
- d. Expression of key PGC markers shown across clusters.
- e. Expression of key PGC markers within each cell group.
- f. Scatter plot showing correlation between Day 3.5 sorted PGCLCs (this study) and Day 4 PGCLCs (Chen *et al*, 2019, Cell Reports). Key PGC marker genes expressed at 2-fold higher level in Day3.5 sorted PGCLCs compared to Day4 PGCLCs (Chen *et al*, 2019, Cell Reports) are shown in green; key PGC marker genes that are not differentially expressed are shown in blue. Statistical test - Pearson correlation with 95% confidence interval, P-value < 2.2e-16.
- g. Gene ontology enrichment analysis of biological processes in Day 3.5 PGCLCs and Day 4 PGCLCs from Chen *et al*, 2019.
