# Supplementary material for: Monolayer platform to generate and purify primordial germ-like cells in vitro provides insights into human germline specification
Source: PubMed Central journal article supplement (PMC10502105; doi:10.1038/s41467-023-41302-w), 2023-09-14
Supplement: 41467_2023_41302_MOESM3_ESM.pdf [file 41467_2023_41302_MOESM3_ESM.pdf]

## **Description of Additional Supplementary Files**

File Name: Supplementary Data 1

Description: Combined hESC DE PGC Legendscreen Analysis

File Name: Supplementary Data 2

Description: Gene Modules Changing by pseudotime trajectory to PGC vs non PGC

File Name: Supplementary Data 3

Description: Expression of FGCs Soma PGCLCs

File Name: Supplementary Data 4

Description: Genes differentially expressed between d4 PGCLCs in cluster 1

File Name: Supplementary Data 5

Description: DEG Bulk RNASeq

File Name: Supplementary Data 6

Description: Reagents and Primers

File Name: Supplementary Movie 1

Description: Time Lapse of PGCLCs differentiation and NANOG-YFP expression in incipiently forming PGCLCs
